# Supplementary material for: Fast synthesis of silver nanowires at room temperatureviaultrasonication-mediated galvanic replacement for flexible transparent electrodes
Source: Royal Society of Chemistry journal article supplement (doi:10.1039/d3tc03670g), 2023-12-21
Supplement: d3tc03670g3.pdf [file d3tc03670g3.pdf]

## ***Supporting Information***

### **Fast Synthesis of Silver Nanowires Under Room Temperature via Ultrasonication-Mediated Galvanic Replacement for Flexible Transparent Electrodes**

Qiusui Chen, Yuehua Ding, Meiling Xu, Ziyi Liu, Zhenpeng Liu, Qiang Liu, Yanmin Qin, Xing Wang, Zheng Fang\*, Haifeng Bao\*

School of Materials Science and Engineering, State Key Laboratory of New Textile Materials & Advanced Processing Technology, Wuhan Textile University, Wuhan 430200, PR China.

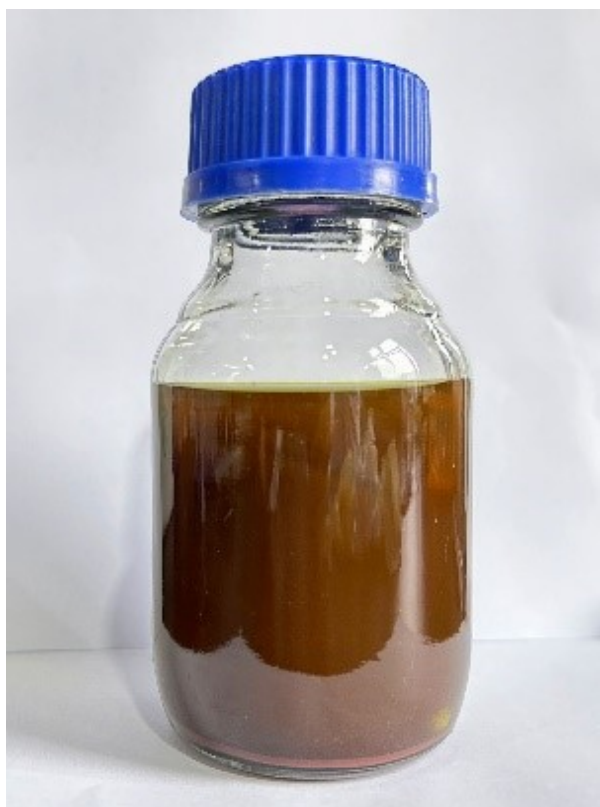

Figure S1. The photographs of synthesized copper nanoparticles.

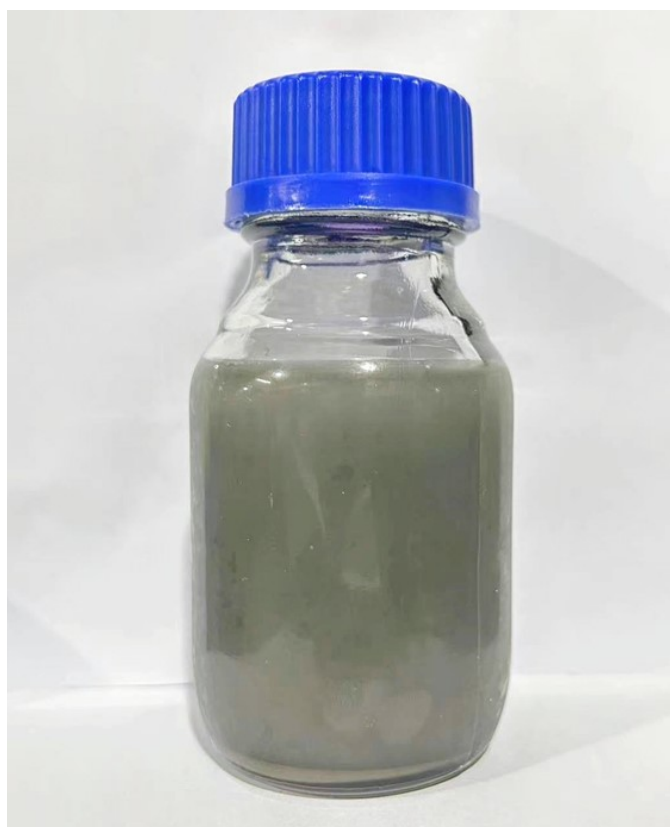

Figure S2. The photographs of synthesized silver nanowires.

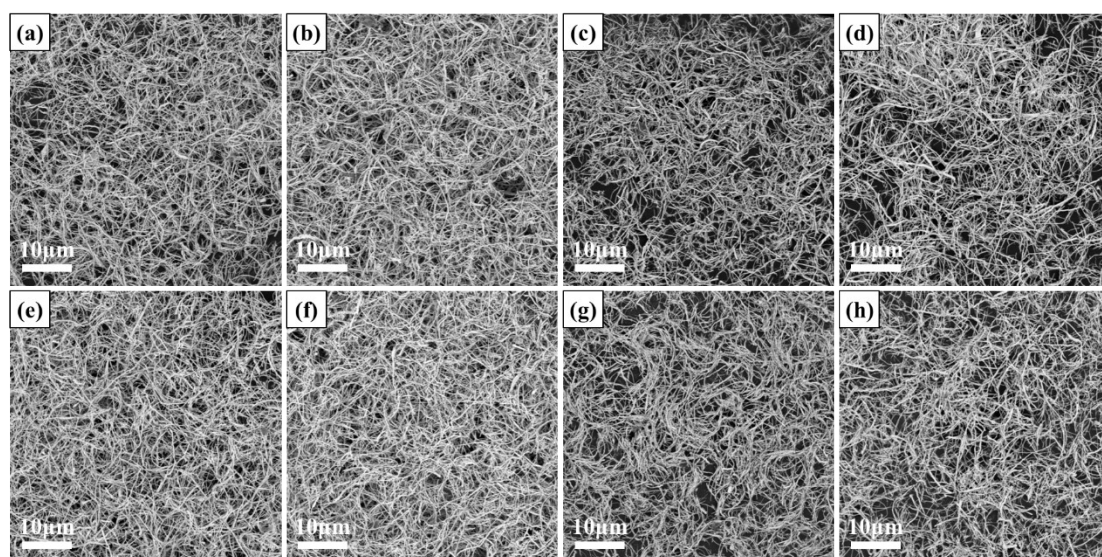

Figure S3. SEM images of AgNWs after sonication for different times: (a) 0 min; (b) 2.5 min; (c) 5 min; (d) 10 min; (e) 20 min; (f) 30 min; (g) 45 min; (h) 60 min.

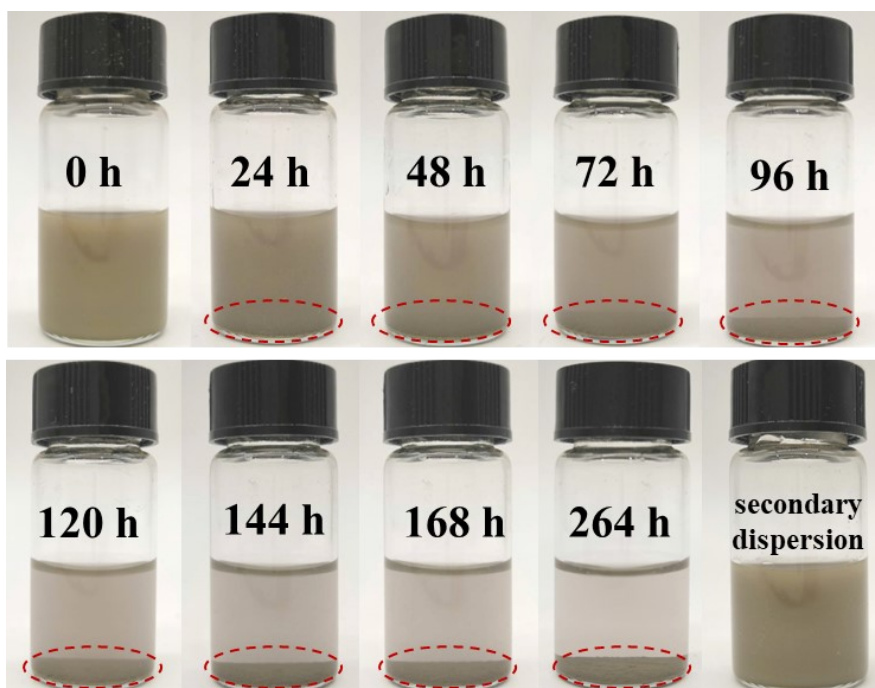

Figure S4. Photographs documenting the dispersion of AgNWs ink.
